# Supplementary material
Source: publisher site journal article supplement (https://www.dovepress.com/article/225739)
Supplement: Supplementary file 1 [file get_supplementary_file.php]

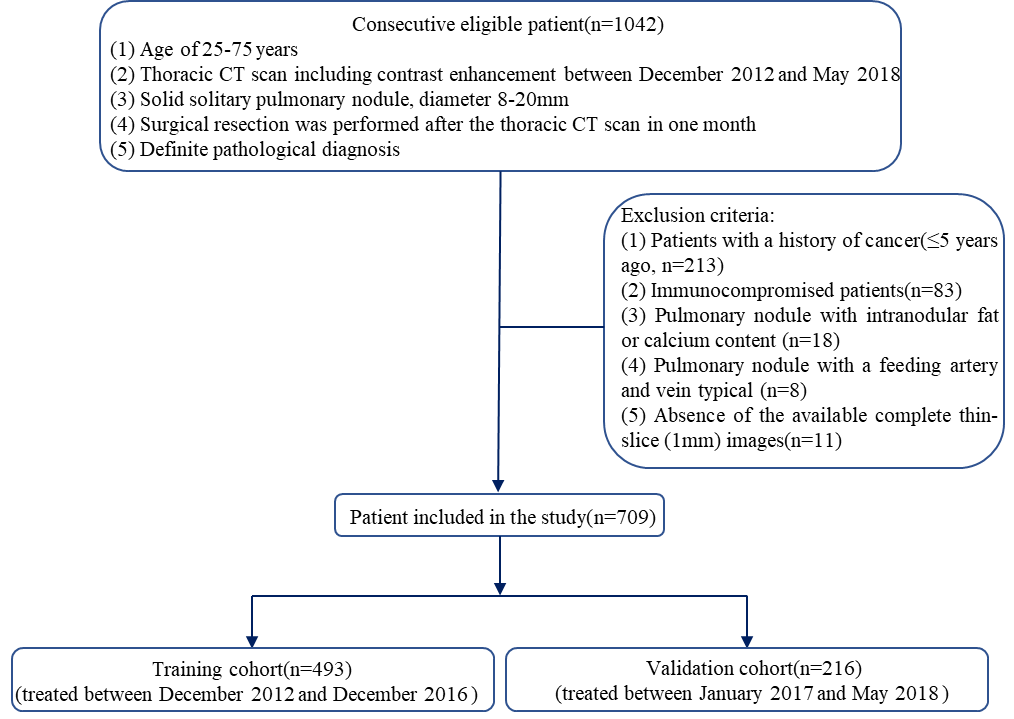


Supplemental Table 1. Clinicopathological characteristics of patients with solid solitary pulmonary nodules 8–20 mm in size in the training and validation cohorts

| Characteristic | Training cohort (n=493) | Validation cohort (n=216) | *P* Value |
| --- | --- | --- | --- |
| Age, mean ± SD, years | 52.34 ± 10.45 | 50.99 ± 10.10 | 0.110 |
| BMI, mean ± SD | 23.49 ± 3.23 | 23.28 ± 3.36 | 0.432 |
| Gender, N(%) |  |  | 0.731 |
| Male | 242 (49.09%) | 103 (47.69%) |  |
| Female | 251 (50.91%) | 113 (52.31%) |  |
| Smoking history, N(%) |  |  | 0.835 |
| No | 327 (66.33%) | 145 (67.13%) |  |
| Yes | 166 (33.67%) | 71 (32.87%) |  |
| Chronic interstitial or obstructive lung disease, N(%) |  |  | 0.772 |
| No | 479 (97.16%) | 209 (96.76%) |  |
| Yes | 14 ( 2.84%) | 7 ( 3.24%) |  |
| Family history of lung cancer, N(%) |  |  | 0.858 |
| No | 418 (84.79%) | 182 (84.26%) |  |
| Yes | 75 (15.21%) | 34 (15.74%) |  |
| History of extra-thoracic malignant neoplasm (>5 years ago), N(%) |  |  | 0.531 |
| No | 471 (95.54%) | 204 (94.44%) |  |
| Yes | 22 ( 4.46%) | 12 ( 5.56%) |  |
| Diameter, mean ± SD, mm | 12.65 ± 4.05 | 12.46 ± 4.13 | 0.573 |
| Upper lobe |  |  | 0.471 |
| No | 261 (52.94%) | 108 (50.00%) |  |
| Yes | 232 (47.06%) | 108 (50.00%) |  |
| Marginal spiculation, N(%) |  |  | 0.861 |
| Normal | 227 (46.04%) | 101 (46.76%) |  |
| Abnormal | 266 (53.96%) | 115 (53.24%) |  |
| Significant enhancement, N(%) |  |  | 0.965 |
| No | 273 (55.38%) | 120 (55.56%) |  |
| Yes | 220 (44.62%) | 96 (44.44%) |  |
| Pleural indentation, N(%) |  |  | 0.774 |
| No | 291 (59.03%) | 125 (57.87%) |  |
| Yes | 202 (40.97%) | 91 (42.13%) |  |
| Emphysema, N(%) |  |  | 0.590 |
| No | 464 (94.12%) | 201 (93.06%) |  |
| Yes | 29 ( 5.88%) | 15 ( 6.94%) |  |
| CEA level, N(%) |  |  | 0.862 |
| Normal | 436 (88.44%) | 192 (88.89%) |  |
| Abnormal | 57 (11.56%) | 24 (11.11%) |  |
| CA125 level, N(%) |  |  | 0.135 |
| Normal | 473 (95.94%) | 212 (98.15%) |  |
| Abnormal | 20 ( 4.06%) | 4 ( 1.85%) |  |
| CA199 level, N(%) |  |  | 0.985 |
| Normal | 454 (92.09%) | 199 (92.13%) |  |
| Abnormal | 39 ( 7.91%) | 17 ( 7.87%) |  |
| CA724 level, N(%) |  |  | 0.288 |
| Normal | 439 (89.05%) | 198 (91.67%) |  |
| Abnormal | 54 (10.95%) | 18 ( 8.33%) |  |
| NSE level, N(%) |  |  | 0.722 |
| Normal | 447 (90.67%) | 194 (89.81%) |  |
| Abnormal | 46 ( 9.33%) | 22 (10.19%) |  |
| SCC level, N(%) |  |  | 0.917 |
| Normal | 460 (93.31%) | 202 (93.52%) |  |
| Abnormal | 33 ( 6.69%) | 14 ( 6.48%) |  |
| Ferritin level, N(%) |  |  | 0.199 |
| Normal | 104 (21.10%) | 55 (25.46%) |  |
| Abnormal | 389 (78.90%) | 161 (74.54%) |  |
| Histology diagnosis of malignancy, N(%) |  |  | 0.509 |
| No | 279 (56.59%) | 128 (59.26%) |  |
| Yes | 214 (43.41%) | 88 (40.74%) |  |

Note：Abbreviations: BMI, Body Mass Index; CEA, carcinoembryonic antigen; CA125, carbohydrate antigen 125; CA199, carbohydrate antigen 199; CA724, carbohydrate antigen 724; NSE, neuron-specific enolase; SCC, squamous cell carcinoma antigen; SD, standard deviation

Supplemental Table 2. Univariate analyses of potential significant predictors of malignancy

| Variable | Training cohort(n=493) | |  | Validation cohort(n=216) | |  | Pooled cohort(n=709) | |
| --- | --- | --- | --- | --- | --- | --- | --- | --- |
| Odds Ratio (95% CI) | *P* value |  | Odds Ratio (95% CI) | *P* value |  | Odds Ratio (95% CI) | *P* value |
| Age, mean ± SD, years | 1.04 (1.03, 1.06) | <0.001🞵 |  | 1.04 (1.01, 1.07) | 0.015🞵 |  | 1.04 (1.03, 1.06) | <0.001🞵 |
| BMI, mean ± SD | 1.01 (0.96, 1.07) | 0.626 |  | 1.01 (0.93, 1.09) | 0.891 |  | 1.01 (0.97, 1.06) | 0.632 |
| Female | 1.14 (0.80, 1.63) | 0.462 |  | 0.86 (0.50, 1.47) | 0.572 |  | 1.05 (0.78, 1.41) | 0.760 |
| Smoking history | 0.96 (0.66, 1.40) | 0.839 |  | 1.69 (0.95, 3.00) | 0.074 |  | 1.14 (0.83, 1.56) | 0.419 |
| Chronic interstitial or obstructive lung disease | 0.51 (0.16, 1.66) | 0.264 |  | 0.23 (0.03, 1.98) | 0.182 |  | 0.41 (0.15, 1.14) | 0.087 |
| Family history of lung cancer | 1.24 (0.76, 2.04) | 0.384 |  | 1.18 (0.56, 2.47) | 0.663 |  | 1.22 (0.81, 1.84) | 0.334 |
| History of extra-thoracic malignant neoplasm (>5 years ago) | 0.60 (0.24, 1.49) | 0.267 |  | 0.27 (0.06, 1.28) | 0.101 |  | 0.47 (0.22, 1.03) | 0.058 |
| Diameter | 1.12 (1.06, 1.17) | <0.001🞵 |  | 1.08 (1.01, 1.15) | 0.029🞵 |  | 1.10 (1.06, 1.15) | <0.001🞵 |
| Upper lobe | 1.56 (1.09, 2.23) | 0.016🞵 |  | 2.56 (1.46, 4.48) | <0.001 |  | 1.80 (1.33, 2.44) | <0.001🞵 |
| Marginal spiculation | 5.03 (3.40, 7.46) | <0.001🞵 |  | 3.37 (1.89, 6.01) | <0.001🞵 |  | 4.45 (3.21, 6.16) | <0.001🞵 |
| Significant enhancement | 13.06 (8.48, 20.11) | <0.001🞵 |  | 10.89 (5.73, 20.69) | <0.001🞵 |  | 12.36 (8.64, 17.67) | <0.001🞵 |
| Pleural indentation | 4.45 (3.03, 6.53) | <0.001🞵 |  | 6.10 (3.36, 11.10) | <0.001🞵 |  | 4.89 (3.54, 6.75) | <0.001🞵 |
| Emphysema | 2.62 (1.19, 5.76) | 0.016🞵 |  | 10.92 (2.40, 49.73) | 0.002🞵 |  | 3.92 (1.98, 7.76) | <0.001🞵 |
| Abnormal CEA level | 4.76 (2.53, 8.96) | <0.001🞵 |  | 2.72 (1.13, 6.53) | 0.025🞵 |  | 3.97 (2.38, 6.60) | <0.001🞵 |
| Abnormal CA125 level | 0.69 (0.27, 1.77) | 0.441 |  | 0.48 (0.05, 4.68) | 0.526 |  | 0.65 (0.28, 1.55) | 0.335 |
| Abnormal CA724 level | 0.68 (0.38, 1.22) | 0.198 |  | 0.71 (0.26, 1.96) | 0.506 |  | 0.69 (0.41, 1.14) | 0.148 |
| Abnormal CA199 level | 1.26 (0.66, 2.43) | 0.486 |  | 2.90 (1.03, 8.18) | 0.043🞵 |  | 1.62 (0.93, 2.80) | 0.086 |
| Abnormal NSE level | 1.00 (0.54, 1.85) | 0.992 |  | 0.65 (0.25, 1.67) | 0.372 |  | 0.88 (0.53, 1.46) | 0.619 |
| Abnormal SCC level | 0.84 (0.41, 1.72) | 0.631 |  | 0.80 (0.26, 2.46) | 0.693 |  | 0.83 (0.45, 1.52) | 0.536 |
| Abnormal Ferritin level | 1.77 (1.12, 2.80) | 0.018🞵 |  | 2.21 (1.13, 4.32) | 0.020🞵 |  | 1.90 (1.31, 2.77) | <0.001🞵 |

Note：Abbreviations: BMI, Body Mass Index; CEA, carcinoembryonic antigen; CA125, carbohydrate antigen 125; CA199, carbohydrate antigen 199; CA724, carbohydrate antigen 724; CI, confidence intervals; NSE, neuron-specific enolase; SCC, squamous cell carcinoma antigen; SD, standard deviation

🞵P value <0.05.

**Supplemental Table 3: Comparison of the performance of the malignancy prediction models for indeterminate solid solitary pulmonary nodules that are 8–20 mm in size: integrated discrimination improvement (IDI) versus net reclassification improvement (NRI)**

|  |  | **IDI (95% CI)** | **P** | **NRI (95% CI)** | **P** |
| --- | --- | --- | --- | --- | --- |
| **The training cohort** | Model 2 vs. Model 1 | 0.0218 (0.008,0.035) | 0.002* | 0.302 (0.183, 0.420) | <0.001* |
| **The validation cohort** | Model 2 vs. Model 1 | 0.001 (-0.018,0.0194) | 0.941 | 0.200 (0.020, 0.381) | <0.001* |

Note: Abbreviations: IDI, integrated discrimination improvement; NRI, net reclassification improvement.

* p-value < 0.05

**Supplemental Table4. Probability of malignancy in indeterminate solid solitary pulmonary nodules 8–20 mm in size**

| Predictors | | |  | Probability | | | | | | | | |
| --- | --- | --- | --- | --- | --- | --- | --- | --- | --- | --- | --- | --- |
| Marginal spiculation | Vascular convergence | Pleural indentation |  | 30y | 35y | 40y | 45y | 50y | 55y | 60y | 65y | 70y |
| 0 | 0 | 0 |  | 0.032 | 0.038 | 0.045 | 0.053 | 0.062 | 0.073 | 0.085 | 0.099 | 0.116 |
| 0 | 1 | 0 |  | 0.100 | 0.117 | 0.136 | 0.157 | 0.181 | 0.208 | 0.238 | 0.270 | 0.306 |
| 0 | 0 | 1 |  | 0.113 | 0.131 | 0.152 | 0.176 | 0.202 | 0.231 | 0.263 | 0.298 | 0.335 |
| 0 | 1 | 1 |  | 0.300 | 0.337 | 0.376 | 0.417 | 0.460 | 0.503 | 0.546 | 0.588 | 0.629 |
| 1 | 0 | 0 |  | 0.232 | 0.264 | 0.299 | 0.336 | 0.375 | 0.416 | 0.459 | 0.502 | 0.544 |
| 1 | 1 | 0 |  | 0.503 | 0.546 | 0.588 | 0.629 | 0.669 | 0.705 | 0.740 | 0.772 | 0.801 |
| 1 | 0 | 1 |  | 0.537 | 0.580 | 0.621 | 0.661 | 0.698 | 0.733 | 0.765 | 0.795 | 0.821 |
| 1 | 1 | 1 |  | 0.796 | 0.822 | 0.846 | 0.867 | 0.886 | 0.902 | 0.916 | 0.929 | 0.939 |

Note: For categorical predictors (marginal spiculation, vascular convergence, and pleural indentation), 0 indicates absent; 1, present.

For Probability values, 30, 35, 40, 45, 50, 55, 60, 65, and 70 refer to age of patient.
